# Supplementary material
Source: PubMed Central journal article supplement (PMC2556182)
Supplement: NIHMS65856-supplement-supplement_1.pdf [file NIHMS65856-supplement-supplement_1.pdf]

**Supplemental Figure 1**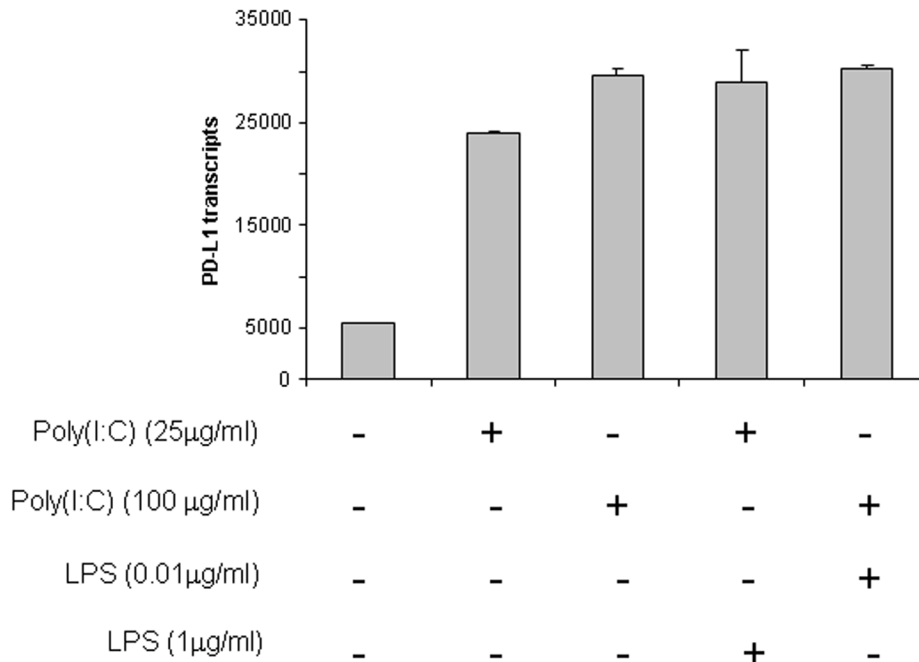

**Supplemental Figure 1. TLR4 stimulation cannot revert the TLR3-mediated induction of the inhibitory ligand PD-L1.** DC were stimulated with poly(I:C) alone or with a combination of poly(I:C) and LPS. After 4 hrs, cells were harvested and PD-L1 transcripts were quantified by real time PCR. Results are expressed as mean  $\pm$  SD of triplicate cultures.
